# Supplementary material
Source: PubMed Central journal article supplement (PMC6503634)
Supplement: jamapediatr-173-446-s002.pdf [file jamapediatr-173-446-s002.pdf]

## Supplementary Online Content

Voss C, Schwartz J, Daniels J, et al. Effect of wearable digital intervention for improving socialization in children with autism spectrum disorder: a randomized clinical trial. *JAMA Pediatr*. Published online March 25, 2019. doi:10.1001/jamapediatrics.2019.0285

**eMethods 1.** Study protocol, additional outcome measures, and emotion classifier accuracy measurements

**eMethods 2.** Treatment Crossover Analysis

**eTable 1.** Primary analysis participant demographics, broken down by analysis groups

**eTable 2.** Primary Moderator Analyses for ABIQ, Age and Gender

**eTable 3.** Six-week follow-up analysis in treatment-first group for exploratory cohort (N=52) and completers (N=39)

**eTable 4.** Mean change in secondary exploratory outcome measures by cohort subgrouping from intake to post-test 1 using the same mixed effects model

**eResults.**

**eReferences.**

This supplementary material has been provided by the authors to give readers additional information about their work.

## **eMethods 1. Study protocol, additional outcome measures, and emotion classifier accuracy measurements**

### **Study Protocol**

After determining eligibility, all participants attended their first appointment (“intake”), where they consented to participate, completed the study measures described below, and were randomly assigned with a 1:1 ratio to either the treatment or control condition after all baseline measures were completed. Families in the control condition received no study intervention from the intake appointment and continued ABA therapy as usual for six weeks, with an option to cross over to the treatment condition at Post-test 1.

Families in the treatment condition received a thorough demonstration of SG at the end of their intake appointment and were sent home with the SG kit consisting of a “how to use your device” guide, a pair of Google Glasses, a pin-protected android phone with the study app installed, and chargers and cases for both. Each family was asked to use the device at least three times per week at home for 20 minutes each, and once per week for 20 minutes with their BI. Participants were instructed to run each of the three engagement activities at least once, but otherwise chose activities freely. App usage was automatically logged for device usage analysis after participants returned their device. All participants completed a second appointment after intake, Post-test 1, during which the control cohort crossed over to the treatment condition, received the device demonstration and took home the device kit after completing study measures. During the post-test 1 appointment, the treatment cohort returned their device and completed a semi-structured interview on their experience in addition to all study measures. All participants then attended a third appointment, Post-test 2, during which the control cohort returned their device and completed a semi-structured interview and study measures, while the treatment cohort completed all final study measures. Only the control cohort attended a final fourth appointment to match the treatment condition arm (Post-test 3), during which the participants completed all study measures. Figure 2 shows the consort flow diagram by study appointment.

### **Additional Outcome Measures**

We used an additional tool, the *Brief Observation of Social and Communicative Change (BOSCC<sup>1,2</sup>)*, as a potential secondary outcome measure and a more child-focused endpoint. The BOSCC is a structured play-based lab assessment intended to measure change in core symptoms of autism in children. Our intention was to use it as a structured lab assessment to measure social behavior change in our treatment cohort when children were not wearing the glasses. The assessment was recorded using both a Go-Pro camera in a corner of the room and glasses worn by the blinded clinical coordinator—simply serving as a second camera.

While the framework for administration of BOSCC has been published, the scoring algorithm and validation of use in independent replicate samples has not yet been published. Therefore, we were unable to use the BOSCC as initially planned. We intend to explore the data collected for this measure in the future if/when the algorithms emerge in the literature. We also hope to develop automated tools for this analysis in the near future.

### **Emotion Classifier Accuracy Measurements**

We measured accuracy in three ways:

First, we performed general accuracy validation for methods used in the machine learning system that powers the Superpower Glass application against the Extended Cohn-Kanade Dataset.<sup>3</sup> The facial expression recognition system achieved 97.0% accuracy across over 9000 static images of humans emoting the 8 different emotions embedded in our tool.

Second, during in-lab training and prior to taking the device home for the treatment period, each family member present was asked to express each of the 8 expressions for the unblinded clinical research coordinator, who wore the wearable device. The device was determined to have “failed” if there existed an expression that (1) the device consistently misclassified, but (2) the acting parent could consistently make in a way that the research coordinator could readily identify. These failure criteria were used to judge whether the family would qualify for a participant-specific model as pursued in our uncontrolled design pilot, and we saw no failure of this type for any of the treatment cohort included in the present study.

Third, we focused the empirical assessment of emotion classification accuracy on Guess the Emotion game play sessions in which the parent selects an emotion to start a session, acts the emotion shortly after making the selection and then records the child's guess, whether correct or incorrect. We sampled between two different emotion prompts, prompt A (e.g. "happy") and prompt B (e.g. "sad") selected in turn by the parent. We considered a true positive found an emotion classification prediction of prompt A before prompt B was selected, we called this a positive. With this procedure, we achieved an overall accuracy of 0.72. Although lower than the that seen with the Cohn-Kanade Dataset (which contains manually annotated expressions acted out by adults facing high resolution cameras together with egocentric framing of the head/face), this accuracy is high for active, real use systems like the SG tool. Moreover, due to the heuristic nature of this measurement (due to the computational tractability and reliability of manual measurement of the thousands of images generated per family during use), this value is likely to be an underestimate. In accord with this accuracy assessment, families did not report problems with the emotion classification accuracy during the study.

## eMethods 2. Treatment Crossover Analysis

### Treatment Crossover Analysis

To take advantage of the additional data available for treatment cohorts, we repeated the exploratory treatment cohort analysis with the *full treatment cohort* including participants who crossed over from the control group. The data was normalized such that the control participants' post-test 1 visit is now labeled as their treatment intake appointment.

### Full Treatment Cohort Demographics

We broke the full cohort down by the same analysis groups. None of the group demographics had statistically significant differences.

| Cohort    | All participants (ITT) |                   |            | Completers |                   |            |
|-----------|------------------------|-------------------|------------|------------|-------------------|------------|
|           | N                      | Mean Age (SD)     | % Male (N) | N          | Mean Age (SD)     | % Male (N) |
| Treatment | 52                     | 8.33 years (2.06) | 90% (N=47) | 39         | 8.49 years (2.20) | 90% (N=35) |
| Control   | 31                     | 7.94 years (1.69) | 84% (N=26) | 25         | 8.44 years (1.83) | 84% (N=21) |
| Total     | 83                     | 8.18 years (1.93) | 88% (N=73) | 64         | 8.47 years (2.05) | 88% (N=56) |

**eTable 1.** Primary analysis participant demographics, broken down by analysis groups

Each demographic cohort is representative of each other. None of the group demographics had statistically significant differences.

| Cohort           | All participants (ITT) |                   |            | Completers |                   |            |
|------------------|------------------------|-------------------|------------|------------|-------------------|------------|
|                  | N                      | Mean Age (SD)     | % Male (N) | N          | Mean Age (SD)     | % Male (N) |
| <b>Treatment</b> | 40                     | 8.64 years (2.52) | 93% (N=37) | 27         | 8.76 years (2.86) | 93% (N=25) |
| <b>Control</b>   | 31                     | 7.94 years (1.69) | 84% (N=26) | 25         | 8.44 years (1.83) | 84% (N=21) |
| <b>Total</b>     | 71                     | 8.38 years (2.46) | 89% (N=63) | 52         | 8.45 years (2.06) | 90% (N=47) |

**eTable 2.** Primary Moderator Analyses for ABIQ, Age and Gender

Each table presents results for an augmentation of eqn. 1 to include the modifier (e.g., age) and interaction terms with treatment, week, as well as a three-way interaction term with treatment and week. Likelihood ratio (LR) tests then assessed whether the modifier significantly impacted the treatment effect.

*ABIQ Moderator Analysis*

| <b>Measure</b>           | <b>Analysis Cohort</b> | <b>Moderator Coefficient</b><br>(gender x treatment x time) | <b>LR Test p value</b> |
|--------------------------|------------------------|-------------------------------------------------------------|------------------------|
| SRS-2                    | All Participants (ITT) | 0.004                                                       | 0.218                  |
|                          | Completers             | 0.003                                                       | 0.236                  |
| EGG                      | All Participants (ITT) | -0.005                                                      | 0.109                  |
|                          | Completers             | -0.005                                                      | 0.075                  |
| VABS-II<br>Socialization | All Participants (ITT) | 0.001                                                       | 0.538                  |
|                          | Completers             | 0.011                                                       | 0.369                  |
| NEPSY-II<br>Affect       | All Participants (ITT) | 0.010                                                       | 0.103                  |
|                          | Completers             | 0.010                                                       | 0.095                  |
| CBCL                     | All Participants (ITT) | 0.007                                                       | 0.070                  |
|                          | Completers             | 0.008                                                       | 0.147                  |
| VABS                     | All Participants (ITT) | -0.001                                                      | 0.552                  |
|                          | Completers             | 0.001                                                       | 0.910                  |

*Age Moderator Analysis*

| <b>Measure</b> | <b>Analysis Cohort</b> | <b>Moderator Coefficient</b><br>(age x treatment x time) | <b>LR Test p value</b> |
|----------------|------------------------|----------------------------------------------------------|------------------------|
| SRS-2          | All Participants (ITT) | 0.183                                                    | 0.411                  |
|                | Completers             | 0.169                                                    | 0.446                  |
| EGG            | All Participants (ITT) | -0.112                                                   | 0.791                  |

|                       |                        |        |               |
|-----------------------|------------------------|--------|---------------|
|                       | Completers             | -0.107 | 0.615         |
| VABS-II Socialization | All Participants (ITT) | -0.052 | 0.797         |
|                       | Completers             | -0.007 | 0.372         |
| NEPSY-II Affect       | All Participants (ITT) | 0.028  | 0.835         |
|                       | Completers             | 0.036  | 0.690         |
| CBCL                  | All Participants (ITT) | 0.029  | 0.854         |
|                       | Completers             | 0.027  | 0.939         |
| VABS-II               | All Participants (ITT) | -0.319 | <b>0.040*</b> |
|                       | Completers             | -0.283 | 0.073         |

*Gender Moderator Analysis*

| Measure               | Analysis Cohort        | Moderator Coefficient<br>(gender × treatment × time) | LR Test <i>p</i> value |
|-----------------------|------------------------|------------------------------------------------------|------------------------|
| SRS-2                 | All Participants (ITT) | 2.10                                                 | 0.185                  |
|                       | Completers             | 1.91                                                 | 0.175                  |
| EGG                   | All Participants (ITT) | 2.48                                                 | <b>0.004*</b>          |
|                       | Completers             | 2.71                                                 | <b>0.002*</b>          |
| VABS-II Socialization | All Participants (ITT) | -1.68                                                | 0.245                  |
|                       | Completers             | -1.85                                                | 0.189                  |
| NEPSY-II Affect       | All Participants (ITT) | -0.058                                               | 0.986                  |
|                       | Completers             | 0.035                                                | 0.769                  |
| CBCL                  | All Participants (ITT) | 0.396                                                | 0.568                  |
|                       | Completers             | 0.320                                                | 0.537                  |
| VABS-II               | All Participants (ITT) | -1.87                                                | 0.275                  |
|                       | Completers             | -1.75                                                | 0.226                  |

**eTable 3.** Six-week follow-up analysis in treatment-first group for exploratory cohort (N=52) and completers (N=39)

Results from the follow-up analysis conducted on all treatment participants, including the normalized treatment portions of control participants who crossed over, are similar to those of the treatment-first cohort. We caution that cross-over participants start their treatment intake after a first control intake appointment, so potential practice effects may have created a higher baseline for these participants.

| Measure                  | Analysis Cohort      | Regression Coefficients |            | $\gamma_2$ Wald Test<br>$p$ value |
|--------------------------|----------------------|-------------------------|------------|-----------------------------------|
|                          |                      | $\gamma_1$              | $\gamma_2$ |                                   |
| SRS-2                    | All treatment        | -0.337                  | -0.245     | <b>0.001*</b>                     |
|                          | Treatment Completers | -0.329                  | 0.143      | <b>0.002*</b>                     |
| EGG                      | All treatment        | 0.770                   | 0.406      | <b>&lt;0.001*</b>                 |
|                          | Treatment Completers | 0.741                   | 0.396      | <b>&lt;0.001*</b>                 |
| VABS-II<br>Socialization | All treatment        | 0.330                   | 0.228      | <b>0.024*</b>                     |
|                          | Treatment Completers | 0.403                   | 0.248      | <b>0.017*</b>                     |
| NEPSY-II<br>Affect       | All treatment        | 0.040                   | 0.020      | 0.523                             |
|                          | Treatment Completers | 0.047                   | 0.054      | 0.453                             |

**eTable 4.** Mean change in secondary exploratory outcome measures by cohort subgrouping from intake to post-test 1 using the same mixed effects model

| Measure         | Analysis Cohort        | Mean change from intake to 6-week post-test 1 (SD) |               |
|-----------------|------------------------|----------------------------------------------------|---------------|
|                 |                        | Treatment                                          | Control       |
| VABS-II Overall | All participants (ITT) | -0.451 (1.443)                                     | 0.889 (1.080) |
|                 | Completers             | -0.836 (1.499)                                     | 0.972 (1.090) |
| CBCL Overall    | All participants (ITT) | -1.130 (1.824)                                     | 0.462 (1.606) |
|                 | Completers             | -1.325 (1.837)                                     | 0.820 (1.621) |

## **eResults**

### **Treatment Cohort Usage Statistics**

The mean intake to post-test 1 time period for the exploratory cohort was 6.84 weeks (SD=1.73 weeks). Families in the treatment group who returned their device for a conclusion appointment ran at least one recorded session on an average of 11.43 (SD = 5.56) days (48% of the requested dosage of 24 days of device activity). Participants chose to play Guess the Emotion for 40.7% of the sessions, Capture the Smile for 24.0% of the sessions, and Free Play for 35.3% of the sessions. Families ran an average of 3.7 (SD=3.56) sessions with their BI, 62% of the recommended dose.

## eReferences

1. Grzadzinski R, Carr T, Colombi C, et al. Measuring Changes in Social Communication Behaviors: Preliminary Development of the Brief Observation of Social Communication Change (BOSCC). *J Autism Dev Disord* 2016; **46**(7): 2464-79.
2. Kitzerow J, Teufel K, Wilker C, Freitag CM. Using the brief observation of social communication change (BOSCC) to measure autism-specific development. *Autism Research* 2016; **9**(9): 940-50.
3. Lucey P, Cohn JF, Kanade T, Saragih J, Ambadar Z, Matthews I. The extended cohn-kanade dataset (ck+): A complete dataset for action unit and emotion-specified expression. *Computer Vision and Pattern Recognition Workshops (CVPRW)*, 2010 IEEE Computer Society Conference on; 2010: IEEE; 2010. p. 94-101.
