# Supplementary material
Source: PubMed Central journal article supplement (PMC6503634)
Supplement: jamapediatr-173-446-s003.pdf [file jamapediatr-173-446-s003.pdf]

## Data Sharing Statement

Voss. Effect of Wearable Digital Intervention for Improving Socialization in Children With Autism Spectrum Disorder. *JAMA Pediatr.* Published March 25, 2019. 10.1001/jamapediatrics.2019.0285

### Data

**Data available:** Yes

**Data types:** Deidentified participant data

**How to access data:** [dpwall@stanford.edu](mailto:dpwall@stanford.edu)

**When available:** With publication

### Supporting Documents

**Document types:** None

### Additional Information

**Who can access the data:** researchers whose proposed use of the data has been approved

**Types of analyses:** for a specified purpose

**Mechanisms of data availability:** with a signed data access agreement
